1 **Zoonothroponotic transmission of SARS-CoV-2 and host-specific viral mutations revealed**  
2 **by genome-wide phylogenetic analysis**

3  
4 Sana Naderi<sup>1</sup>, Peter E. Chen<sup>1,2</sup>, Carmen Lía Murall<sup>1,3</sup>, Raphael Poujol<sup>4</sup>, Susanne Kraemer<sup>3</sup>,  
5 Bradley S. Pickering<sup>5,6,7</sup>, Selena M. Sagan<sup>1,8\*</sup>, B. Jesse Shapiro<sup>1,9\*</sup>

- 6  
7 1. Department of Microbiology & Immunology, McGill University, Montreal, QC, Canada  
8 2. Département de sciences biologiques, Université de Montréal, Montreal, QC, Canada  
9 3. Public Health Agency of Canada, Winnipeg, MB, Canada  
10 4. Research Centre, Montreal Heart Institute, Montreal, QC, Canada  
11 5. National Centre for Foreign Animal Disease, Canadian Food Inspection Agency,  
12 Winnipeg, MB, Canada  
13 6. Department of Veterinary Microbiology and Preventative Medicine, College of Veterinary  
14 Medicine, Iowa State University, Ames, Iowa, USA  
15 7. Department of Medical Microbiology and Infectious Diseases, University of Manitoba,  
16 Winnipeg  
17 8. Department of Biochemistry, McGill University, Montreal, QC, Canada  
18 9. McGill Genome Centre, Montreal, QC, Canada

19  
20 \*for correspondence: [selena.sagan@mcgill.ca](mailto:selena.sagan@mcgill.ca); [jesse.shapiro@mcgill.ca](mailto:jesse.shapiro@mcgill.ca)

21  
22 **Abstract**

23  
24 Severe Acute Respiratory Syndrome Coronavirus 2 (SARS-CoV-2) is a generalist virus,  
25 infecting and evolving in numerous mammals, including captive and companion animals, free-  
26 ranging wildlife, and humans. Transmission among non-human species poses a risk for the  
27 establishment of SARS-CoV-2 reservoirs, makes eradication difficult, and provides the virus  
28 with opportunities for new evolutionary trajectories, including selection of adaptive mutations  
29 and emergence of new variant lineages. Here we use publicly available viral genome  
30 sequences and phylogenetic analysis to systematically investigate transmission of SARS-CoV-2  
31 between human and non-human species and to identify mutations associated with each  
32 species. We found the highest frequency of animal-to-human transmission from mink, compared  
33 with negligible transmission from other sampled species (cat, dog, and deer). Although inferred  
34 transmission events could be limited by sampling biases, our results provide a useful baseline  
35 for further studies. Using genome-wide association studies, no single nucleotide variants  
36 (SNVs) were significantly associated with cats and dogs, potentially due to small sample sizes.  
37 However, we identified three SNVs statistically associated with mink and 26 with deer. Of these  
38 SNVs,  $\sim\frac{2}{3}$  were plausibly introduced into these animal species from local human populations,  
39 while the remaining  $\sim\frac{1}{3}$  were more likely derived in animal populations and are thus top  
40 candidates for experimental studies of species-specific adaptation. Together, our results  
41 highlight the importance of studying animal-associated SARS-CoV-2 mutations to assess their  
42 potential impact on human and animal health.

43

44 **Importance.** SARS-CoV-2, the causative agent of COVID-19, can infect many animal species,  
45 making eradication difficult because it can be reseeded from different reservoirs. When viruses  
46 replicate in different species, they may be faced with different evolutionary pressures and acquire  
47 new mutations, with unknown consequences for transmission and virulence in humans. Here we  
48 analyzed SARS-CoV-2 genome sequences from cats, dogs, deer, and mink to estimate  
49 transmission between each of these species and humans. We found several transmission events  
50 from humans to each animal, but very few detectable transmissions from animals back to humans,  
51 with the exception of mink. We also identified three mutations more likely to be found in mink than  
52 humans, and 26 in deer. These mutations could help the virus adapt to life in these different  
53 species. Ongoing surveillance of SARS-CoV-2 from animals will be important to understand their  
54 potential impacts on both human and animal health.

## 55 Introduction

56 Coronaviruses can have broad animal host ranges, and severe acute respiratory syndrome  
57 coronavirus-2 (SARS-CoV-2) is no exception. Although the animal reservoir of ancestral SARS-  
58 CoV-2 remains unknown, SARS-CoV-2 has close relatives in bats and an ancestral variant likely  
59 spilled over into humans via an intermediate animal host in a seafood market in Wuhan, China  
60 (Worobey et al. 2022). Although SARS-CoV-2-related coronaviruses from animals in the Wuhan  
61 market were not sampled, there have been several subsequent reports of SARS-CoV-2  
62 transmission (“spillback”) from humans to animals including in farmed mink (Oude Munnink et al.  
63 2021) and wild white-tailed deer (*Odocoileus virginianus*) (Kuchipudi et al. 2022; Kotwa et al.  
64 2022). Consequently, transmission among potential animal reservoirs is a key feature of the past  
65 and future evolution of coronaviruses. In addition to making SARS-CoV-2 elimination highly  
66 unlikely, evolution in animal reservoirs could transiently increase evolutionary rates (Porter et al.  
67 2022) and potentially select for novel mutations with effects on transmission and virulence in  
68 humans (Otto et al. 2021). Viral adaptation to one host species might result in the tradeoff of  
69 reduced transmission in other species. Alternatively, it could permit significant genetic drift,  
70 opening up new peaks in the human-adaptive fitness landscape. For example, it is speculated  
71 that the SARS-CoV-2 Omicron variant of concern (VOC) might have evolved in a non-human  
72 animal (possibly rodent) before transmitting widely among humans (Wei et al. 2021). Although  
73 this scenario remains hypothetical and is not exclusive of other hypotheses involving evolution in  
74 unsampled human populations or a chronically infected individual, it illustrates the potential  
75 dramatic consequences of evolution in animal reservoirs. Ongoing transmission among humans  
76 and non-human animals and its implications for viral evolution and host adaptation thus deserves  
77 further study.

78  
79 There have been several reports of SARS-CoV-2 transmission from humans to individual species  
80 of animals, and in some cases back to humans. In addition to farmed mink (Oude Munnink et al.  
81 2021), there have also been reports of transmission from pet hamsters (Yen et al. 2022) and  
82 possible transmission events from white-tailed deer to humans in North America (Pickering et al.  
83 2022). Evidence suggests that certain mutations may improve replication fitness of SARS-CoV-2  
84 in animal hosts. For instance, experimental infections of mink (*Neovison vison*) and ferret (*Mustela*  
85 *furo*) identified mutations within the viral spike (S) protein that increase binding to the ACE2  
86 receptor in these animals, while decreasing infection of human airway cells (Zhou et al. 2022).  
87 One of these mutations (S:N501T) was also found to be prevalent in infected mink sampled in the  
88 United States (Cai and Cai 2021; Eckstrand et al. 2021).

89

90 While such case studies have been valuable in highlighting patterns of transmission and  
91 adaptation across individual animal species since the beginning of the pandemic, a standardized,  
92 global analysis of the available data is lacking. In this study, we comprehensively compared  
93 SARS-CoV-2 sequences derived from animal hosts using a broad dataset. Using phylogenetic  
94 methods, we inferred transmission events between humans and four other frequently infected  
95 animals and quantified their relative frequencies. Our analysis revealed a relatively high number  
96 of mink-to-human transmission events, while instances of animal-to-human transmission from  
97 cats (*Felis catus domesticus*), dogs (*Canis lupus familiaris*), or deer (*Odocoileus virginianus*) were  
98 rare. Using genome-wide association studies (GWAS), we also identified mutations associated  
99 with specific animal species. We recovered the S:N501T mutation previously associated with  
100 mink, along with two other amino acid changes in other SARS-CoV-2 genes. We also identified  
101 several novel mutations associated with deer, including both synonymous and nonsynonymous  
102 substitutions. Together, our work provides a quantitative framework for tracking SARS-CoV-2  
103 transmission across animals from available genomic sequences and points to several candidate  
104 animal-adaptive mutations for experimental follow-up.

105

## 106 **Results**

107 Although secondary spillover events of SARS-CoV-2 transmission from animals back to humans  
108 have been reported, their frequency has yet to be quantified and compared across animal  
109 species. To this end, we retrieved all available SARS-CoV-2 genome sequences sampled from  
110 non-human animals from GISAID (**Supplementary Table S1**). After applying sequence quality  
111 filters (**Supplementary Table S2**) and considering only animals with 30 or more sequences, we  
112 were left with four species: cat, dog, mink and deer. Our filters excluded common experimental  
113 animals such as mice and ferrets. For each of the four animal species, we extracted a similar  
114 number of closely-related human-derived sequences (Methods). If these closely-related animal-  
115 human pairs represent recent transmission chains, we would expect them to come from the same  
116 geographic region. Consistent with this expectation, we found that 95.4% of deer-derived  
117 sequences share the same sampling location as their close human-derived relatives, and this  
118 percentage is slightly lower for cat (85.6%), dog (89%), and mink (91.7%). The high percentage  
119 for deer could be due to higher sampling effort in North America, the origin of all deer sequences.  
120 More generally, the variation in these percentages could be explained by other sampling biases.  
121 For example, cats and dogs might be undersampled relative to mink and deer.

122

123 To investigate potential animal-to-human transmission events in greater detail, including the  
124 direction of transmission, we used ancestral state reconstruction on viral phylogenetic trees. We  
125 are aware that such ancestral state reconstruction can be biased by differential sampling across  
126 species. Our goal is, therefore, not to infer absolute rates of cross-species transmission, but rather  
127 to provide a consistent comparative framework for interspecies transmission. For each candidate  
128 species, the animal-derived sequences, and their closest relative human-derived sequence were  
129 combined with ten random sub-samplings of human-derived sequences ( $n \approx 50$  per subtree per  
130 month of the pandemic), from which we inferred ten replicate phylogenies per species, providing  
131 an assessment of phylogenetic uncertainty. Using ancestral state reconstruction as previously  
132 described (Murall et al. 2021), we counted the most basal animal-to-human (**Figure 1a-d**) and  
133 human-to-animal transitions on each tree (**Supplementary Table S3**). Representative detailed  
134 trees are available in **Supplementary Figures S1-S4**. To determine a lower bound for the  
135 transmission counts, we excluded transition branches with <75% bootstrap support (Methods).  
136 As further validation, we performed a permutation test to determine whether the estimated  
137 transmission counts converged on a non-random value. We performed the same ancestral state  
138 reconstruction on 1000 permutations of each of the 40 phylogenies whose tip labels (animal or  
139 human) were shuffled randomly, and the number of transmissions in both directions were  
140 recorded. This permutation test revealed that in both directions (animal-to-human and human-to-  
141 animal) the observed transmission counts in mink, deer, and cat falls within a narrow range  
142 (standard deviations of 27.74, 1.29, and 0.52 respectively) compared to the permutations (266.06,  
143 2.84, and 1.87) while the observed counts in dog (standard deviation of 1.10) is similar to the  
144 permutations (0.91). In the human-to-animal direction, the observed standard deviations in  
145 transmission counts are 0.48, 0.73, 2.17, and 2.17 for cat, dog, mink and deer, respectively,  
146 compared to permuted values of 6.66, 1.70, 186.05, and 16.46. These results show that, in  
147 general, our inference of transmission events converges on a non-random value but that the  
148 estimate for dog-to-human transmission might be less reliable.

149  
150 Based on the bootstrap-filtered counts, we inferred less than one transmission event from animals  
151 back to humans on average from cats, dogs, and deer (**Figure 1e, Table 1**). In contrast, there  
152 were an average of 12 or more transmission events inferred from mink to human. The upper  
153 bound (bootstrap unfiltered) estimates are higher, but the pattern of much higher transmission  
154 from mink is retained. The inferred number of transmissions in the opposite direction, from human-  
155 to-animal, was generally higher and much more uniform across species (**Figure 1f, Table 1**), with

156 lower bounds in the range of 4.6 to 12.8 events. However, the higher sampling of human-derived  
157 compared with animal-derived sequences may have inflated the human-to-animal events relative  
158 to the animal-to-human events. Mink are also better sampled than the other animal species (**Table**  
159 **1**), and further sampling of other animals could identify more transmission events. Despite these  
160 caveats, it is notable that human-to-animal transmission events are relatively constant across  
161 animal species, while mink-to-human transmission is much higher (or at least more frequently  
162 detected) compared with other animals.

163

164 **Table 1: Average inferred transmission events between humans and animals.**

165

| Average inferred number of transitions (filtered – unfiltered) | Mink (n=1038) | Deer (n=134) | Cat (n=78) | Dog (n=39) |
|----------------------------------------------------------------|---------------|--------------|------------|------------|
| Animal-to-human                                                | 12.5 – 108.3  | 0.3 – 1.1    | 0 – 4.4    | 0.1 – 1.6  |
| Human-to-animal                                                | 12.8 – 65.4   | 11.6 – 59.5  | 8.5 – 68.3 | 4.6 – 35.0 |

166

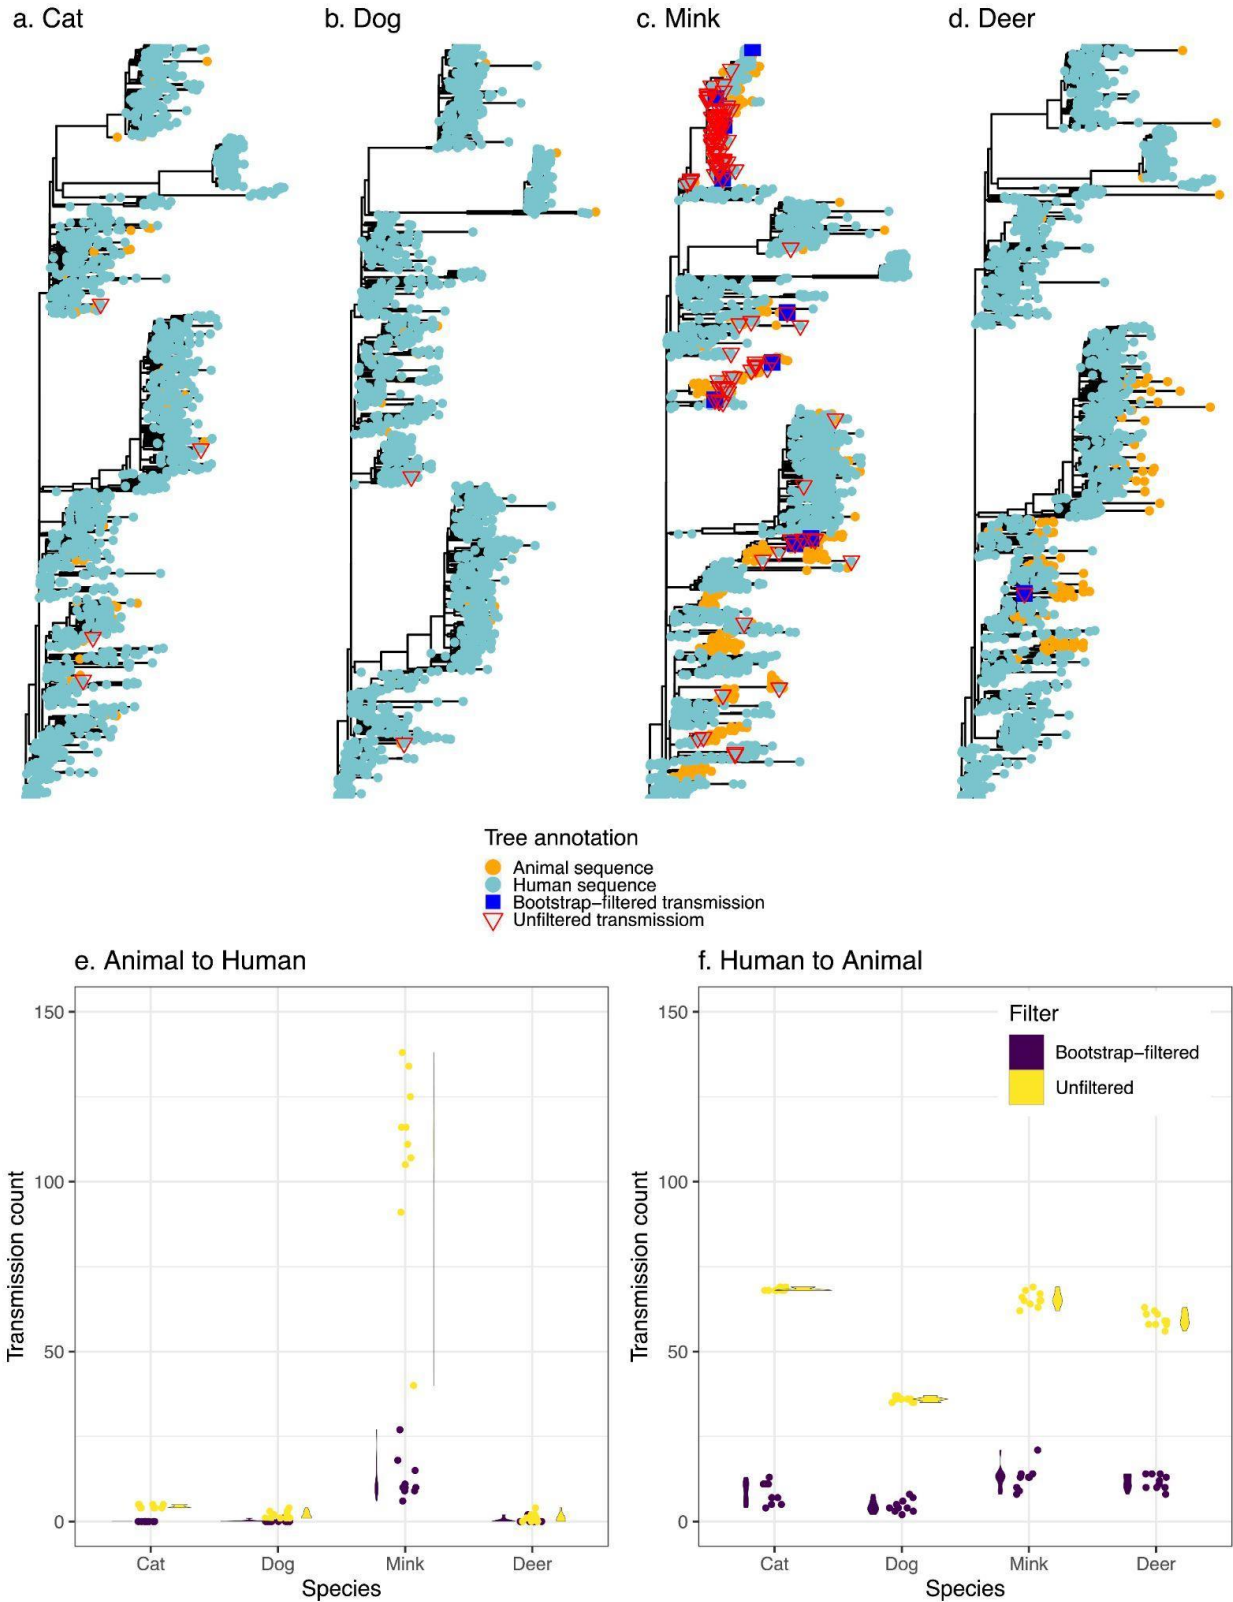

167  
168  
169  
170

**Figure 1. Transmission events inferred between humans and animals.** Panels a-d display a representative tree for every species with animal to human transmissions marked on the tree. More detailed versions of these trees are in **Supplementary Figures S1-S4**. Trees are rooted with the Wuhan reference



171 genome. Panels e and f display the distribution (violin plots alongside points plotted with jitter to avoid  
172 overlap) of inferred transmission counts (across 10 replicate trees) in each animal species, in both  
173 bootstrap-filtered and unfiltered trees.

174

175

176 Next, we sought to identify mutations associated with particular animal species compared to  
177 humans. These mutations could be candidates for species-specific adaptations. To do so, we  
178 conducted GWAS using POUTINE, a method which implicitly controls for population structure and  
179 linkage (non-independence) between mutations by considering only homoplastic mutations that  
180 are identical by state, but not identical by descent, and that have occurred independently multiple  
181 times in the phylogeny (Chen and Shapiro 2021). We performed a separate GWAS to identify  
182 mutations associated with each species, and replicated the GWAS on each of the ten replicate  
183 trees described above.

184

185 We identified numerous single nucleotide variants (SNVs) with high statistical significance  
186 associated with mink and deer, but none in cats or dogs (**Figure 2**). In all cases, we used a  
187 significance cutoff of a family-wise  $p < 0.05$  to correct for multiple hypothesis testing. The mink  
188 GWAS revealed three unique SNVs (**Table 2**). One of these hits appears in all ten replicates and  
189 the remaining two appear in at least half of the replicates. All three of these mutations are non-  
190 synonymous, including S:N501T which was previously associated with a mink outbreak in the  
191 United States (Cai and Cai 2021). Inspecting the distributions of these GWAS hits across the tree  
192 reveals several independent origins (**Figure S3**). For example, S:N501T occurred independently  
193 in The Netherlands, Denmark, Latvia, Lithuania, Spain, France, and the USA (**Figure S3**),  
194 explaining the strong association detected by POUTINE. The deer GWAS revealed a total of 26  
195 unique statistically significant SNVs, of which seven appear in all ten replicates, and five in at  
196 least half the runs (**Table 3**). Out of these 26 hits, five are intergenic (within the 5' and 3' UTRs)  
197 and 12 are synonymous mutations. Notably, 21 of the hits are C>U transition mutations. The  
198 seven hits found in all ten replicates clearly occur multiple times independently in different  
199 branches of the tree; for example, ORF1ab:N4899I (which affects amino acid 507 of the mature  
200 RNA-dependent RNA polymerase protein, nsp12) occurs at least twice independently in both the  
201 states of New York and Iowa (**Figure S4**).

202

203 We next asked whether mutations identified by GWAS plausibly occurred in an animal host or if  
204 they were more likely circulating in a local human population before being transmitted to a different  
205 animal host. While both these categories of mutations are statistically associated with a particular



206 animal species, the former are particularly good candidates for animal-specific adaptations. To  
 207 address this question, we obtained the global frequency of the minor allele of each significant  
 208 GWAS hit in Cov-Spectrum (C. Chen et al. 2021) – a significantly larger database than our  
 209 downsampled trees used for GWAS. The minor alleles were generally rare (<1% frequency;  
 210 **Supplementary Tables S4 & S5**), as expected for animal-associated mutations in a large  
 211 database dominated by human sequences. To test the hypothesis that animal-associated  
 212 mutations arose not in animals but in a local human population that then transmitted to animals  
 213 in the same region, for each GWAS hit we first defined the “in” region in which the animals  
 214 containing the mutation were sampled and the “out” regions including all other regions. We then  
 215 performed a Fisher’s exact test to determine if human-derived sequences containing the animal-  
 216 associated mutation were enriched in the “in” region, resulting in an odds ratio (OR) significantly  
 217 higher than 1 (Methods). For mink, two GWAS hits had OR significantly greater than 1 ( $P <$   
 218 0.0001, **Table 2**). Only the S:N501T mutation had OR significantly less than 1, making it the best  
 219 candidate for having arisen in a mink host, rather than in a human who later transmitted the mutant  
 220 virus to a mink. For deer, the majority of GWAS hits (18/26) could be explained by transmission  
 221 from the local human population ( $OR > 1$ ) while the remaining eight could not ( $OR < 1$  or not  
 222 significantly different than 1, **Table 3**).

223

224

225 **Table 2. Single-nucleotide variants associated with mink by GWAS.** “Pos” refers to the nucleotide  
 226 position in the reference genome. Homoplasmy counts in focal animals (cases), humans (controls), and  $P$ -  
 227 values are averaged across replicates in which the site’s family-wise  $P$ -values was  $< 0.05$ . Where  
 228 applicable, amino acid positions refer to the polyprotein with mature protein positions in parenthesis. The  
 229 ‘local transmission odds ratio’ is the result of a Fisher’s exact test of the likelihood that the alternate base  
 230 (animal-associated minor allele) was enriched in the local human population where the mink sequences  
 231 bearing the alternate base were sampled (Methods). n.s., not significant. Odds ratio  $P$ -values: \*  $< 0.05$ , \*\*  
 232  $< 0.01$ , \*\*\*  $< 0.001$ .

233

| Pos.  | Ref. base | Alt. base | Amino acid change  | Gene                         | Homoplasmy count in focal animal | Homoplasmy count in humans | $P$ -value (pointwise) | $P$ -value (familywise) | Significant in N replicates | Local transmission odds ratio |
|-------|-----------|-----------|--------------------|------------------------------|----------------------------------|----------------------------|------------------------|-------------------------|-----------------------------|-------------------------------|
| 26047 | U         | G         | L219V              | ORF3a                        | 6                                | 0                          | 0.0014                 | 0.0365                  | 10                          | 3.93***                       |
| 12795 | G         | A         | G4177E (nsp9 G37E) | ORF1ab/pp1ab/nsp9/repli case | 6                                | 0                          | 0.0015                 | 0.0368                  | 6                           | 7.53***                       |
| 23064 | A         | C         | N501T              | Spike/S1/RB D/binds ACE2     | 6.4                              | 0                          | 0.0010                 | 0.0258                  | 5                           | 0.48***                       |

234

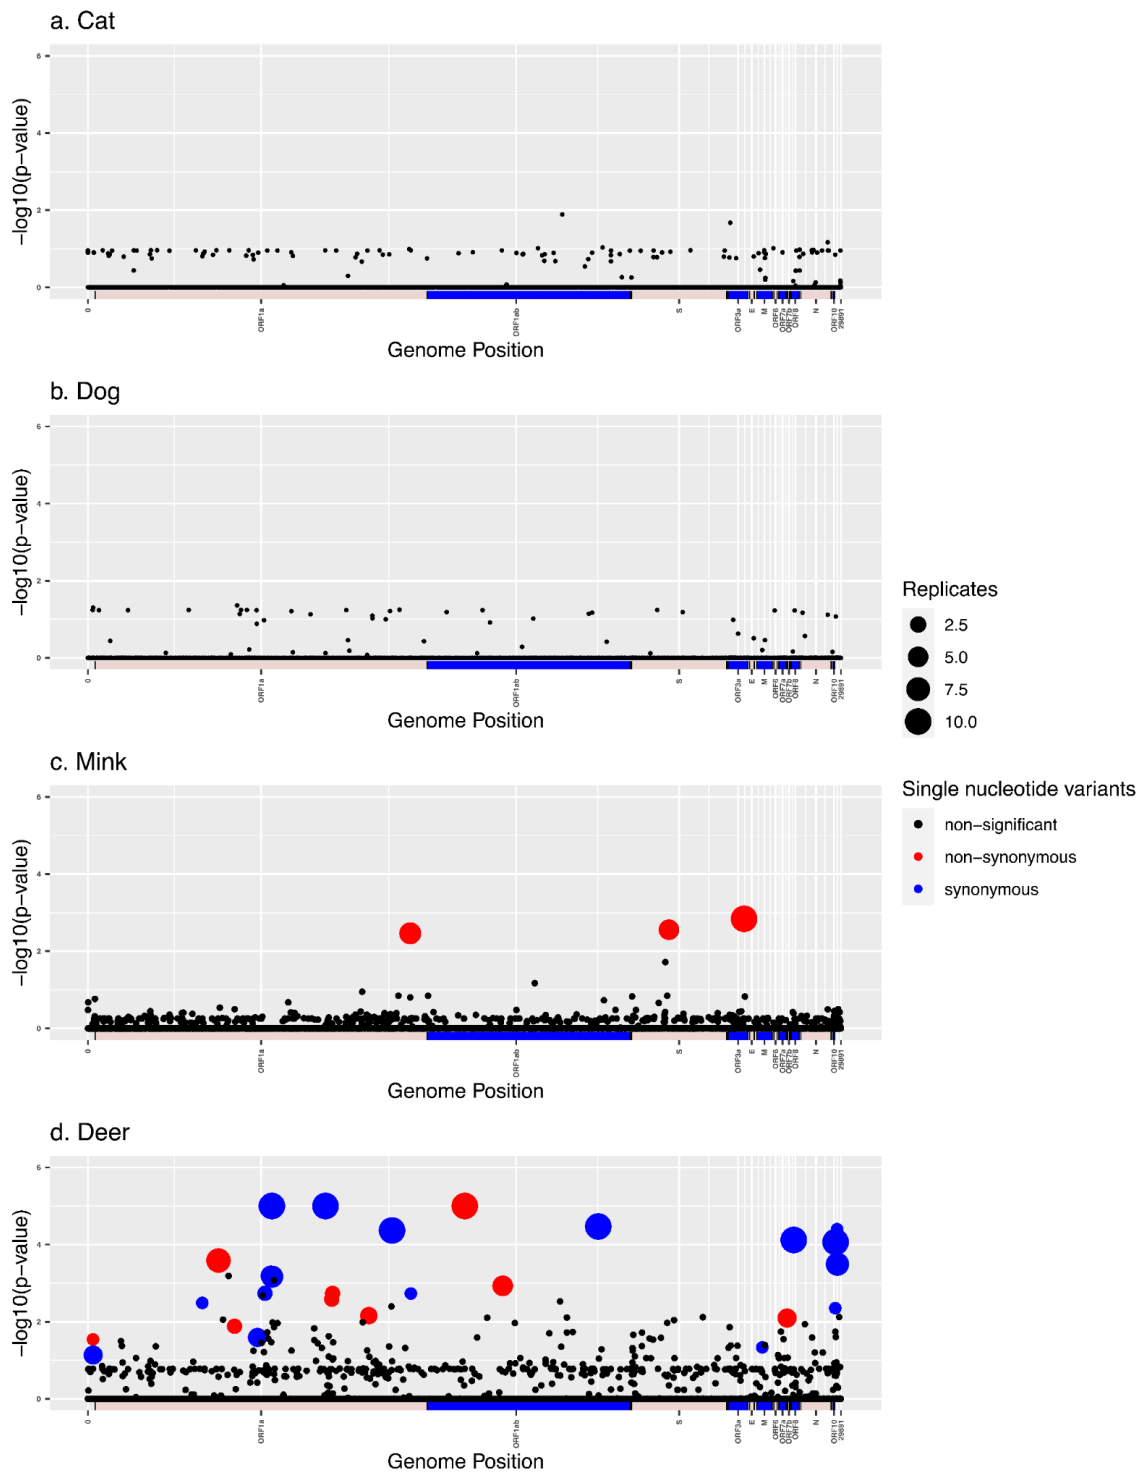

235  
236  
237  
238  
239  
240

**Figure 2: Manhattan plots summarizing GWAS hits in each animal species.** In every panel, the x-axis represents the nucleotide position in the SARS-CoV-2 reference genome and the y-axis represents the  $-\log_{10}$  of the pointwise  $p$ -values averaged over replicates. ORFs are shown as alternating blue and pink horizontal bars along the x-axis. Statistically significant hits with family-wise corrected  $p$ -values of lower

241 than 0.05 are shown in red (non-synonymous) or blue (synonymous), while non-statistically significant *p*-  
 242 values are in black.

243  
 244 **Table 3. Single-nucleotide variants associated with deer by GWAS.** “Pos” refers to the nucleotide  
 245 position in the reference genome. Homoplasy counts in focal animals (cases), humans (controls), and *P*-  
 246 values are averaged across replicates in which the site’s family-wise *P*-values was < 0.05. Where  
 247 applicable, amino acid positions refer to the polyprotein with mature protein positions in parenthesis. IG,  
 248 Intergenic. The ‘local transmission odds ratio’ is the result of a Fisher’s exact test of the likelihood that the  
 249 alternate base (animal-associated minor allele) was enriched in the local human population where the deer  
 250 sequences bearing the alternate base were sampled (Methods). n.s., not significant. Odds ratio *P*-values:  
 251 \* < 0.05, \*\* < 0.01, \*\*\* < 0.001.

252

| Pos.  | Ref. base | Alt. base | Amino acid change    | Gene                    | Homoplasy count in focal animal | Homoplasy count in humans | <i>P</i> -value (pointwise) | <i>P</i> -value (familywise) | Significant in N replicates | Local transmission odds ratio |
|-------|-----------|-----------|----------------------|-------------------------|---------------------------------|---------------------------|-----------------------------|------------------------------|-----------------------------|-------------------------------|
| 7303  | C         | U         | I2346I (nsp3 1524)   | ORF1a/pp1ab /pp1a/nsp3  | 17.8                            | 1.2                       | 9.99E-06                    | 9.99E-06                     | 10                          | 2.51***                       |
| 9430  | C         | U         | I3055I (nsp4 I292I)  | ORF1a/pp1ab /pp1a/nsp4  | 15.2                            | 6.2                       | 9.99E-06                    | 9.99E-06                     | 10                          | 2.20***                       |
| 14960 | A         | U         | N4899I (nsp12 N507I) | ORF1ab/pp1ab/nsp12/RdRp | 7.8                             | 0.1                       | 9.99E-06                    | 1.09E-05                     | 10                          | 0**                           |
| 20259 | C         | U         | F6665F (nsp15 F213F) | ORF1ab/pp1ab/nsp15      | 4.8                             | 0.1                       | 3.39E-05                    | 0.0013                       | 10                          | n.s.                          |
| 28016 | C         | U         | F41F                 | ORF8                    | 4                               | 0                         | 7.59E-05                    | 0.0061                       | 10                          | 6.09***                       |
| 12073 | C         | U         | D3936D (nsp7 D67D)   | ORF1a/pp1ab /pp1a/nsp7  | 5.2                             | 1.1                       | 4.29E-05                    | 0.0025                       | 10                          | n.s.                          |
| 29679 | C         | U         | IG                   | 3’UTR                   | 5                               | 1.8                       | 8.59E-05                    | 0.0055                       | 10                          | 3.17***                       |
| 5184  | C         | U         | P1640L (nsp3 P822L)  | ORF1a/pp1ab /pp1a/nsp3  | 4.6                             | 1.6                       | 0.0002                      | 0.0115                       | 8                           | 2.61***                       |
| 29750 | C         | U         | IG                   | 3’UTR/S2M               | 5                               | 2.6                       | 0.0002                      | 0.0103                       | 7                           | 3.12***                       |
| 7318  | C         | U         | F2351F (nsp3 F1533F) | ORF1a/pp1ab /pp1a/nsp3  | 4                               | 0.3                       | 0.0001                      | 0.0114                       | 6                           | 3.80***                       |
| 16466 | C         | U         | P5401L (nsp13 P77L)  | ORF1ab/pp1ab/nsp13/Hel  | 5                               | 1                         | 4.99E-05                    | 0.0019                       | 5                           | 4.09***                       |
| 7267  | C         | U         | F2334F (nsp3 F1516F) | ORF1a/pp1ab /pp1a/nsp3  | 4.4                             | 0.8                       | 9.39E-05                    | 0.0079                       | 5                           | 2.79***                       |
| 210   | G         | U         | IG                   | 5’UTR/SL5a              | 4                               | 0.5                       | 0.0001                      | 0.0136                       | 4                           | 3.98***                       |
| 6730  | C         | U         | N2155N (nsp3 N1337N) | ORF1a/pp1ab /pp1a/nsp3  | 4                               | 0.75                      | 0.0002                      | 0.0168                       | 4                           | 1.81**                        |
| 27752 | C         | U         | T120I                | ORF7a                   | 4                               | 0.75                      | 0.0002                      | 0.0169                       | 4                           | 4.03***                       |

|       |   |   |                      |                        |   |     |          |        |   |         |
|-------|---|---|----------------------|------------------------|---|-----|----------|--------|---|---------|
| 11152 | C | U | V3629V (nsp6 V60V)   | ORF1a/pp1ab /pp1a/nsp6 | 4 | 0.7 | 0.0002   | 0.0153 | 3 | 0.80**  |
| 5822  | C | U | L1853F (nsp3 L1035F) | ORF1a/pp1ab /pp1a/nsp3 | 4 | 0.5 | 0.0001   | 0.0118 | 2 | n.s.    |
| 9711  | C | U | S3149F (nsp4 S386F)  | ORF1a/pp1ab /pp1a/nsp4 | 4 | 0.5 | 8.49E-05 | 0.0118 | 2 | 0.56**  |
| 9679  | C | U | F3138F (nsp4 F375F)  | ORF1a/pp1ab /pp1a/nsp4 | 4 | 0   | 9.49E-05 | 0.0067 | 2 | 2.32*** |
| 7029  | C | U | S2255F (nsp3 S1437F) | ORF1a/pp1ab /pp1a/nsp3 | 4 | 0.5 | 0.0002   | 0.0149 | 2 | 0.22*** |
| 29738 | C | A | IG                   | 3'UTR/S2M              | 4 | 0   | 3.99E-05 | 0.0059 | 1 | n.s.    |
| 26767 | U | C | I82T                 | ORF5/M                 | 4 | 0   | 8.99E-05 | 0.0057 | 1 | 4.09*** |
| 203   | C | U | IG                   | 5'UTR/SL5a             | 4 | 1   | 0.0003   | 0.0191 | 1 | 5.94*** |
| 12820 | A | G | L4185L (nsp9 L45L)   | ORF1a/pp1ab /pp1a/nsp9 | 5 | 1   | 3.99E-05 | 0.0009 | 1 | 4.52*** |
| 4540  | C | U | Y1425Y (nsp3 Y607Y)  | ORF1a/pp1ab /pp1a/nsp3 | 4 | 1   | 0.0002   | 0.0239 | 1 | 2.80*** |
| 29666 | C | U | L37F                 | ORF10                  | 4 | 1   | 0.0002   | 0.0219 | 1 | 1.54*** |

253  
254  
255  
256  
257  
258  
259  
260  
261  
262  
263  
264  
265  
266  
267  
268  
269  
270

## Discussion

SARS-CoV-2 transmission between humans and animals has typically been studied in individual species in isolation, and using heterogeneous methods and datasets. Similarly, viral mutations associated with particular species have been reported, but largely in experimental studies or region-specific sampling efforts that are difficult to generalize. Our goal in this study was to apply standardized methods to identify animal-to-human transmission events and to discover animal-associated mutations using viral genomic data readily available to date. The results are necessarily biased by sampling effort. Specifically, oversampling of human-derived sequences could bias the ancestral state reconstruction toward human-to-animal rather than animal-to-human transmission. In the future, such biases could be avoided using a Bayesian structured coalescent approximation (De Maio et al. 2015). Our approach nevertheless provides a 'level playing field' upon which to assess the results of previous animal-specific studies. Our study also provides a pipeline for researchers to assess the transmission and evolution of SARS-CoV-2 within animals and between animals and humans.

271 Consistent with previous reports (Oude Munnink et al. 2021), mink had the largest number of  
272 inferred transmission events to humans. This could be because mink have more opportunities to  
273 interact with humans on mink farms, whereas contact between deer and humans is more limited  
274 and potentially seasonal (Kuchipudi et al. 2022). However, mink outbreaks could be more  
275 frequently reported due to higher surveillance of mink farms and noticeable symptomatic disease  
276 in these animals (Oreshkova et al. 2020). As for cats and dogs, we inferred much lower  
277 transmission to humans, suggesting that they might be “dead-ends” for the virus. This does not  
278 mean that SARS-CoV-2 transmission from dogs or cats to humans is not possible, and it may be  
279 more readily detected with deeper sampling or in prospective household transmission studies.  
280 Nonetheless, transmission from humans to animals was remarkably uniform across species and  
281 small differences across species may be explained by sampling effort. Overall, our results support  
282 the previous reports of relatively high rates of mink to human transmission, and only rare or  
283 anecdotal transmission from other animals, such as deer (Pickering et al. 2022).

284  
285 Despite the large sample size of mink-derived viral sequences, we only detected three mink-  
286 associated SNVs using GWAS, including the previously identified S:N501T mutation. This is  
287 consistent with relatively little time for SARS-CoV-2 to adapt to mink between transmission cycles  
288 in humans. In contrast, we detected many more SNVs associated with deer despite a smaller  
289 sample size. Even if we only consider the eight SNVs less likely to have arisen in human  
290 population before transmitting to deer, or the seven SNVs detected in all replicate GWAS runs,  
291 there are still more than twice as many deer-associated than mink-associated GWAS hits. This  
292 could suggest a greater number of deer-adapted SNVs compared to mink-adapted SNVs,  
293 perhaps due to multiple uninterrupted cycles of deer-deer transmission. Sustained deer-deer  
294 transmission is also supported by previous studies (Kuchipudi et al. 2022), including the  
295 observation of relatively divergent SARS-CoV-2 genomes (Pickering et al. 2022). Asymptomatic  
296 or mild disease in deer relative to mink (Oreshkova et al. 2020) might also allow more opportunity  
297 for evolution and transmission during prolonged infections. Despite pruning out highly divergent  
298 branches, including several of the Canadian sequences involved in a potential deer-to-human  
299 transmission event (Pickering et al. 2022), some relatively long deer-associated branches are  
300 notable in our study (**Figure 1d**). Together, these results point to deer as an important reservoir  
301 of novel SARS-CoV-2 mutations. Ongoing monitoring of deer-to-human transmission events is  
302 therefore warranted.

303

304 Several viral mutations have been previously associated with cat and dog (Elaswad et al. 2020),  
305 but we found no statistically significant mutations associated with either of these species. This  
306 could be due to limited viral adaptation, which would be expected if cats and dogs are effectively  
307 dead-end hosts for the virus, with little time for cycles of intra-species transmission. Alternatively,  
308 the limited sample size for these species could have limited GWAS power to identify adaptive  
309 mutations. Given the higher viral load and shedding in cats compared to dogs (Bosco-Lauth et al.  
310 2020; Shi et al. 2020), we expect greater adaptation and transmission in cats; however, further  
311 data will be needed to test this expectation.

312

313 We identified three statistically significant mutations associated with mink. The substitution  
314 ORF3a:L219V, which appears in all ten GWAS replicates, has been previously detected as a  
315 substitution associated with mink, in the ORF3a accessory gene (Elaswad et al. 2020). However,  
316 the previous detection was not statistically tested for significance. Similarly, the ORF1ab:G4177E  
317 (nsp9:G37E) mutation has been identified previously in mink-derived sequences (Eckstrand et al.  
318 2021). The S:N501T substitution has also been previously associated with mink (Lu et al. 2021;  
319 Elaswad et al. 2020) and ferret (Zhou et al. 2022), and the same site, has also been reported to  
320 be adaptive in mice, with an S:N501Y amino acid substitution. The mink-associated S:N501T  
321 substitution has been associated with increased binding to human ACE2 (Starr et al. 2020). The  
322 S:N501Y substitution has been detected in several human SARS-CoV-2 VOCs with higher  
323 transmissibility, such as the Alpha variant (Y. Liu et al. 2021; Vöhringer et al. 2021). Certain other  
324 mutations that have been previously associated with mink, including S:Y453F (Zhou et al. 2022;  
325 Lu et al. 2021; Elaswad et al. 2020) and S:L260F (Adney et al. 2022) that were suggested to arise  
326 as a result of rapid adaptation, do not appear to be statistically significant mutations based on our  
327 GWAS. While such mutations could be truly animal-associated and were not picked up in GWAS  
328 due to limited power or sampling, others may be anecdotal reports that do not survive the scrutiny  
329 of rigorous statistical testing, or associations identified in laboratory conditions that are not  
330 currently observed in nature.

331

332 Many of the deer-associated mutations are synonymous and occur broadly across the genome  
333 outside of the relatively well-studied spike (S) protein (**Figure 2**). These are primarily transition  
334 mutations, which are typically generated at a higher frequency than transversions. The deer-  
335 associated synonymous mutations showed no particular bias toward codons that are preferred in  
336 deer relative to humans; therefore selection for codon usage optimization does not easily explain  
337 these associations (data not shown). Nonetheless, the vast majority of mutations were C>U

338 transitions, which may be a reflection of APOBEC1-mediated RNA editing, which results in  
339 deamination of cytosine to uracil in single-stranded RNA (Harris and Dudley 2015; Salter and  
340 Smith 2018). Consistent with this hypothesis, C>U transitions in deer contained the consensus  
341 sequence [U/A][U/A]C[A/U][A/U], which resembles that observed for human APOBEC1-mediated  
342 deamination [AU]C[AU]; however, it remains to be seen whether the deer APOBEC1 isoform has  
343 the same substrate specificity or whether there is increased APOBEC expression or activity in  
344 deer tissue (Di Giorgio et al. 2020; Rosenberg et al. 2011)). Alternatively, the C>U transitions may  
345 be related to RNA secondary structure or nucleotide composition biases required for genome  
346 condensation during viral replication, organelle biogenesis, or virion assembly in the deer host.

347 Our GWAS revealed several mutations in deer that localized to distinct RNA secondary structures  
348 in the 5' and 3' UTRs of the viral RNA. Specifically, in the 5' UTR, both mutations (C203U and  
349 G210U) localized to stem loop 5a (SL5a), a highly conserved stem-loop structure previously  
350 implicated in virion assembly in related coronaviruses (Yang and Leibowitz 2015; Morales Lucia  
351 et al. 2013; Miao et al. 2021). Similarly, in the 3' UTR, all the mutations localized to the 3' terminal  
352 stem-loop structure, with two specifically localized to the S2M region (C29738A and C29750U)  
353 (Yang and Leibowitz 2015; Gilbert and Tengs 2021; Wacker et al. 2020). Interestingly, while the  
354 3' terminal stem-loop structure is known to be hypervariable, the S2M region is highly conserved  
355 in sequence and structure across a wide range of RNA viruses, including members of the  
356 *Astroviridae*, *Caliciviridae*, *Picornaviridae*, and *Coronaviridae* families (Tengs et al. 2013; Gilbert  
357 and Tengs 2021). While the role of this S2M region is poorly understood, its strict conservation  
358 across a range of positive-strand RNA viruses suggests that it may play an important role in the  
359 viral life cycle. Notably, both the mutations identified by GWAS are predicted to maintain the  
360 overall S2M consensus fold, so these may reflect differences in species-specific interactions  
361 between S2M and host proteins or RNA molecules.

362 The deer GWAS also revealed a few nonsynonymous mutations in viral proteins important in RNA  
363 binding and host antiviral responses. Specifically, ORF1ab:N4899I (nsp12:N507I) lies in the  
364 nsp12 RNA-dependent RNA polymerase, within the highly conserved motif G which is important  
365 in positioning the 5' template strand during viral RNA synthesis (Sheahan et al. 2020). While N507  
366 is known to make contact with the +2 nucleotide of the template strand, experimental  
367 investigations will be needed to understand how the N507I mutation impacts the active site  
368 structure and/or viral RNA synthesis (Hillen et al. 2020). The ORF1ab:P5401L (nsp13:P77L)  
369 mutation in the nsp13 helicase is predicted to be a solvent-exposed residue within the N-terminal  
370 Zinc-binding domain (Newman et al. 2021). However, given that this is distant from the helicase



371 active site, we predict that it is unlikely to affect helicase enzymatic activity. Finally, we identified  
372 two mutations that may have implications for host adaptation as they are identified in proteins  
373 known to interact with the host antiviral response. Specifically, ORF1a:P1640L (nsp3:P822L) in  
374 the nsp3 protease localizes to the deubiquitinating site in the PLpro domain which overlaps with  
375 the ISG15 binding site, suggesting it may modulate host antiviral responses (Yang and Leibowitz  
376 2015; Shin et al. 2020; G. Liu et al. 2021). Interestingly, the deer GWAS also revealed the  
377 ORF7a:T120I mutation within the ORF7a accessory protein. This residue is adjacent to K119,  
378 which is implicated in the inhibition of the antiviral response in human cells (Redondo et al. 2021;  
379 Cao et al. 2021). Specifically, K119 polyubiquitination has been shown to block STAT2  
380 phosphorylation, leading to inhibition of type I IFN. Thus, it is possible that the ORF7a:T120I  
381 mutation modulates ubiquitination at the K119 residue; however, this will require experimental  
382 validation.

383 Upon finalization of this manuscript, another analysis of SARS-CoV-2 transmission and potential  
384 host adaptation was published, using a similar dataset from GISAID (Tan et al. 2022). Notably,  
385 this work focused only on transmission from humans to other animals, while we also considered  
386 the animal-to-human direction. The approach used to identify animal-associated mutations was  
387 conceptually similar to ours – focusing on homoplasic mutations and a set of reasonable but  
388 arbitrary filters for allele frequencies and effect sizes – whereas we took a more formal statistical  
389 GWAS approach. Our three mink GWAS hits are a subset of the four identified in the other study,  
390 and neither study identified any deer-associated mutations in Spike (Tan et al. 2022). Our study  
391 identified more significantly deer-associated mutations (including the single hit reported by Tan et  
392 al. in nsp3, ORF1a:L1853F (nsp3:L1035F), which could be due to different data filtering and  
393 significance testing approaches. Overall, the two studies are complementary, and pave the way  
394 for future studies on larger datasets.

395 In conclusion, while the dynamics of anthroponosis and zooanthroponosis for SARS-CoV-2 are  
396 still unclear, cross-species transmission events are likely to continue to occur given continued  
397 geographically widespread infections, high transmission rates, and the emergence of new  
398 variants. We identified several statistically significant animal-associated substitutions in mink and  
399 deer, suggestive of sustained animal-to-animal transmission and perhaps reflective of host  
400 adaptation. This suggests that continuous molecular surveillance of SARS-CoV-2 animal isolates  
401 is likely to reveal new insights into SARS-CoV-2 host range and adaptation, and may contribute  
402 to our understanding of risk for spillback of new variants. This also highlights the need to monitor  
403 for similar patterns of susceptibility to infection and sustained intra-species transmission in related

404 species. Our study draws attention to several specific, statistically significant nucleotide and  
405 amino acid substitutions that may play a role in host adaptation, pathogenesis, and/or  
406 transmission and are candidates for experimental study.

407

## 408 **Methods**

409

410 **Data:** On February 28, 2022, we downloaded from GISAID all SARS-CoV-2 consensus genome  
411 sequences derived from non-human animals. These host species include several mammalian  
412 species such as whitetail deer, mink, cats, dogs, lions, and monkeys among others. The raw non-  
413 human dataset obtained from GISAID was filtered for low-quality sequences, sequences with a  
414 length of less than 29k base pairs, and an ambiguous nucleotide (N) count above 500. Sequences  
415 with incomplete dates recorded in the metadata were discarded and excluded from the study.  
416 This study focuses on species with at least 30 sequences in the dataset, namely mink (n=1038),  
417 deer (n=134), cat (n=78), and dog (n=39).

418

419 From the 7.6 million human-derived viral sequences present in GISAID's human alignment dated  
420 February 28, 2022, a set of closely related sequences for every animal species was extracted. To  
421 do so, we used Nextstrain (Hadfield et al. 2018) to calculate a proximity matrix based on pairwise  
422 substitutions between every animal-derived sequence and all ~8 million human-derived  
423 sequences. The query alignment was generated using MAFFT (Kato and Standley 2013) in  
424 which animal sequences were aligned to the gapped version of the Wuhan lv04 reference  
425 sequence present in GISAID's human-host alignment dated February 28, 2022, with the  
426 "keeplength" option of the software enabled to maintain the length of context alignment in the  
427 query alignment.

428

429 Using this matrix and noting that some sequences from a given species might share a number of  
430 close relatives, we extracted the closest human-derived sequences for every sequence of a given  
431 species such that the unique set of best-hit human-host sequences for a particular species would  
432 have roughly the same count as the sequences from that animal species. To provide greater and  
433 more representative phylogenetic context, 500 human-derived sequences were subsampled  
434 randomly from every month of the pandemic, from January 2020 to February 2022, resulting in  
435 13,000 human-derived sequences, distributed uniformly over time. Here again, the same quality  
436 filtering criteria were applied and the sample was drawn from sequences that were at least 29000

437 base pairs long and had fewer than 500 ambiguous nucleotides (“N” characters). The GISAID  
438 identifiers for all sequences used in this study are reported in **Supplementary Table S1**.

439

440 **Alignment:** All the above sequences, that is, the animal-host sequences along with their closely  
441 related human host sequences and the context random human subsample, and the Wuhan IV04  
442 reference sequence were aligned using MAFFT (version 7.471). We used the NW-NS-2 setting,  
443 which is a speed-oriented, progressive method without FFT approximation. The alignment was  
444 done in two steps; first, a preliminary alignment was done and problematic sequences causing  
445 almost invariant insertions due to stretches of ambiguous nucleotides (N's) were removed from  
446 the dataset, and the remaining sequences were aligned again with the exact same algorithm,  
447 resulting in the final alignment, including a total of 14787 sequences, comprised of 1038 mink  
448 sequences, 134 deer sequences, 39 dog sequences, and 78 cat sequences. As for the closely  
449 related human-host sequences, this dataset included 852 close relatives for mink, 61 for cat, 31  
450 for dog, and 123 for deer. The remaining sequences were human-host sequences randomly  
451 subsampled.

452

453 **Phylogeny:** Ten replicate trees for each candidate species were generated, each of which  
454 included the focal species' sequences, its closely related human-host sequences, and one-tenth  
455 of the randomly subsampled human-host sequences which were again split uniformly over time  
456 to ensure temporal heterogeneity, resulting in an overall count of 40 trees. Maximum-likelihood  
457 divergence trees were inferred using IQ-TREE (Nguyen et al. 2015) with a general time-reversible  
458 model and with 1000 bootstrap iterations. The resulting trees were pruned for branches that are  
459 unreasonably divergent, and tips whose lengths were considered outliers according to the  
460 interquartile criterion and were longer than  $q_{0.75} + 1.5IQR$  were pruned.  $q_{0.75}$  in the above term  
461 refers to the third quartile, and  $IQR$  refers to the difference between the first and the third quartiles.  
462 This criterion discarded a maximum of 5 deer sequences out of 134, a maximum of 2 mink sequences  
463 out of 1038, and a maximum of 1 dog sequence out of 39, while no cat sequences were pruned.

464

465 **Ancestral state reconstruction:** Discrete ancestral state reconstruction was performed on all 40  
466 trees in the study, with states set as “human” and “animal”. The reconstruction was done using  
467 the maximum likelihood method “ace” implemented in the “ape” R package (Paradis and Schliep  
468 2019). Ancestral state reconstruction was done using the “equal rates model” which allows for an  
469 equal probability of transition in both directions of “animal to human” and “human to animal” on  
470 the tree.

471

472 **Estimating transmission events:** Once the states were labeled, the set of all branches along  
473 which a transition from an “animal” node state to a “human” node state has occurred was  
474 identified, and the human end of the branch, namely the most recent common ancestor of the  
475 introduced human clade or the human tip in case of singletons, was marked as a transition node.  
476 In order to identify an independent set of transitions and to avoid the redundancy of reporting  
477 nested spilled-back clades as separate events, the most basal of these transition nodes were  
478 identified. In order to provide a well-rounded record of spillovers, the same analysis was done in  
479 the human to animal direction as well. For setting a lower bound to the transmission counts, in  
480 another set of analyses, all transitions in the desired direction were identified, then the branches  
481 whose parent side had a bootstrap support of lower than 75% were discarded, and subsequently,  
482 the most basal transitions were identified. To validate the ancestral state reconstruction and the  
483 transmission counts, a permutation test was done in which the tips of every 10 trees for all  
484 candidate species were randomly shuffled in 1000 permutations, and the same algorithm for  
485 ancestral state reconstruction and subsequently counting transitions in both directions (animal to  
486 human and human to animal) was applied to find the most basal transitions, unfiltered counts on  
487 the shuffled trees.

488

489 **Genome-wide association studies:** We used POUTINE (Chen and Shapiro 2021) to scan the  
490 genome for mutations that are statistically associated with each animal species. POUTINE relies  
491 on the viral phylogeny to identify homoplastic mutations associated with a phenotype of interest,  
492 in this case human vs. animal hosts. By considering only homoplastic mutations at the tips of the  
493 tree, POUTINE implicitly accounts for population structure. POUTINE was run on the 40 tree  
494 replicates (10 per species) and in each run, animal-host sequences were set as “cases” and  
495 human-host sequences as “controls.” We chose to treat animals as cases because the root of the  
496 tree is human, and initial transmission events are human-to-animal with more recent and rare  
497 animal-to-human events. The dataset is, therefore, better suited to identify animal-associated  
498 mutations than human-associated mutations. In each of the ten replicates for every species, any  
499 sites with a minor allele familywise p-value of less than 0.05 were recorded as a hit for that run.  
500 The unique collective set of hits for every species across all 10 runs was retained and the number  
501 of replicates in which each hit appeared was recorded.

502

503 **Fisher’s exact test for geographic bias:** In order to check for geographical bias we performed  
504 a Fisher’s exact test on every SNV identified by POUTINE to compare its frequency in human

505 hosts inside and outside regions where animal-host sequences bearing these mutations are  
506 found. For each SNV, we obtained its geographical distribution of human-host sequence counts  
507 broken down by geographical division from CoV-Spectrum. We partitioned global divisions into  
508 regions that animal-host sequences bearing the specific mutation are found in—namely, “in”  
509 regions, and regions in which such sequences are not found, or “out” regions. We then created  
510 the 2 by 2 contingency table in which rows correspond to wildtype allele and alternate (animal-  
511 associated) allele counts, and columns correspond to “in” or “out” region counts. We then  
512 calculated the pointwise estimate and confidence interval for the odds ratio, and flagged mutations  
513 in which the two frequencies were significantly different. Counts and frequencies for this step are  
514 recorded in Supplementary tables S4 and S5.

515

516 **Code availability:** Scripts used to perform all analyses are available at  
517 <https://github.com/Saannah/Animal.SARS-CoV-2.git>

518

519 **Acknowledgments.** We thank all the authors, developers, and contributors to the GISAID  
520 database for making their SARS-CoV-2 sequences publicly available. We are grateful to  
521 CoVaRR-Net colleagues Sally Otto, Art Poon, Caroline Colijn, Will Hsiao, Fiona Brinkman, Paul  
522 Gordon, Arinjay Banerjee, Jason Kindrachuk, Angie Rasmussen, and Samira Mubareka for  
523 useful discussions that helped improve the manuscript.

524 **Funding.** This study was supported by the Canadian Institutes for Health Research (CIHR)  
525 operating grant to the Coronavirus Variants Rapid Response Network (CoVaRR-Net). Data  
526 analyses were enabled by computing and storage resources provided by Compute Canada and  
527 Calcul Québec.

528

529

530 **Supplementary Figures**

531

532 **Figure S1.** Detailed representative phylogeny of cat- and human-derived SARS-CoV-2  
533 sequences. In order to make the tree topology clear, branch lengths are not to scale.

534

535 **Figure S2.** Detailed representative phylogeny of dog- and human-derived SARS-CoV-2  
536 sequences. In order to make the tree topology clear, branch lengths are not to scale.

537

538 **Figure S3** Detailed representative phylogeny of mink- and human derived SARS-CoV-2  
539 sequences. In order to make the tree topology clear, branch lengths are not to scale. The coloured  
540 boxes to the right of the tree show the allelic state of the three mink-associated GWAS hits in  
541 each terminal branch of the phylogeny.

542

543 **Figure S4.** Detailed representative phylogeny of deer- and human derived SARS-CoV-2  
544 sequences. In order to make the tree topology clear, branch lengths are not to scale. The coloured  
545 boxes to the right of the tree show the allelic state of the seven deer-associated GWAS hits that  
546 appeared in all ten replicate GWAS runs.

547

548

549

550 **Supplementary Tables**

551

552 **Table S1.** GISAID accession numbers of all sequences used in this study.

553

554 **Table S2.** Number of viral sequences passing quality filters. The counts show the initial number  
555 of sequences downloaded from GISAID from each animal species, and the remaining number  
556 after each consecutive quality filter. The 'quality control' count shows the number of sequences  
557 after removing those with incomplete sampling dates and/or >500 ambiguous bases (Ns). The  
558 'post-alignment pruning' shows the count after removing sequences shorter than 29,000 bases  
559 and/or with an insertion absent in all other sequences (introducing a gap in the alignment). The  
560 'divergent tree branches' shows the count after removing sequences that introduce long branches  
561 into the phylogeny (Methods). Ranges of counts indicate variation across tree replicates.

562

563

| <i>Species</i> | <i>Raw downloaded<br/>(N sequences)</i> | <i>Post-quality<br/>control</i> | <i>Post-alignment<br/>pruning</i> | <i>Post-divergent<br/>tree branch<br/>pruning</i> |
|----------------|-----------------------------------------|---------------------------------|-----------------------------------|---------------------------------------------------|
| mink           | 1339                                    | 1046                            | 1038                              | 1036                                              |
| deer           | 156                                     | 153                             | 134                               | 129-133                                           |
| cat            | 120                                     | 100                             | 78                                | 78                                                |
| dog            | 76                                      | 59                              | 39                                | 38-39                                             |

564

565

566

567



568 **Table S3.** Table of transmission counts for all candidate species, in both animal to human and  
 569 human to animal direction, for both bootstrap-filtered and unfiltered cases.  
 570

| Species | Replicate | Animal to human (Bootstrap-filtered) | Animal to human (Un-filtered) | Human to animal (Bootstrap-filtered) | Human to animal (Un-filtered) |
|---------|-----------|--------------------------------------|-------------------------------|--------------------------------------|-------------------------------|
| Mink    | 1         | 15                                   | 138                           | 21                                   | 63                            |
| Mink    | 2         | 9                                    | 111                           | 14                                   | 66                            |
| Mink    | 3         | 6                                    | 116                           | 13                                   | 69                            |
| Mink    | 4         | 10                                   | 107                           | 9                                    | 62                            |
| Mink    | 5         | 18                                   | 40                            | 13                                   | 68                            |
| Mink    | 6         | 9                                    | 134                           | 8                                    | 65                            |
| Mink    | 7         | 10                                   | 125                           | 10                                   | 67                            |
| Mink    | 8         | 27                                   | 105                           | 14                                   | 65                            |
| Mink    | 9         | 10                                   | 91                            | 13                                   | 65                            |
| Mink    | 10        | 11                                   | 116                           | 13                                   | 64                            |
| Deer    | 1         | 0                                    | 0                             | 10                                   | 58                            |
| Deer    | 2         | 1                                    | 1                             | 14                                   | 58                            |
| Deer    | 3         | 0                                    | 0                             | 11                                   | 59                            |
| Deer    | 4         | 0                                    | 1                             | 10                                   | 59                            |
| Deer    | 5         | 0                                    | 0                             | 13                                   | 58                            |
| Deer    | 6         | 2                                    | 2                             | 14                                   | 56                            |
| Deer    | 7         | 0                                    | 1                             | 8                                    | 63                            |
| Deer    | 8         | 0                                    | 2                             | 10                                   | 61                            |
| Deer    | 9         | 0                                    | 0                             | 14                                   | 62                            |
| Deer    | 10        | 0                                    | 4                             | 12                                   | 61                            |
| Cat     | 1         | 0                                    | 5                             | 7                                    | 69                            |
| Cat     | 2         | 0                                    | 4                             | 11                                   | 68                            |
| Cat     | 3         | 0                                    | 5                             | 5                                    | 68                            |
| Cat     | 4         | 0                                    | 4                             | 11                                   | 69                            |
| Cat     | 5         | 0                                    | 5                             | 5                                    | 68                            |

|            |    |   |   |    |    |
|------------|----|---|---|----|----|
| <b>Cat</b> | 6  | 0 | 5 | 7  | 68 |
| <b>Cat</b> | 7  | 0 | 4 | 13 | 69 |
| <b>Cat</b> | 8  | 0 | 4 | 11 | 68 |
| <b>Cat</b> | 9  | 0 | 4 | 11 | 68 |
| <b>Cat</b> | 10 | 0 | 4 | 4  | 68 |
| <b>Dog</b> | 1  | 0 | 4 | 5  | 35 |
| <b>Dog</b> | 2  | 0 | 1 | 8  | 36 |
| <b>Dog</b> | 3  | 0 | 1 | 7  | 37 |
| <b>Dog</b> | 4  | 0 | 2 | 3  | 37 |
| <b>Dog</b> | 5  | 0 | 3 | 4  | 36 |
| <b>Dog</b> | 6  | 1 | 3 | 2  | 36 |
| <b>Dog</b> | 7  | 0 | 1 | 4  | 35 |
| <b>Dog</b> | 8  | 0 | 1 | 3  | 36 |
| <b>Dog</b> | 9  | 0 | 1 | 6  | 36 |
| <b>Dog</b> | 10 | 0 | 2 | 4  | 35 |

571  
572

573 **Table S4.** Human-derived sequence counts bearing each of the significant GWAS hits identified  
 574 in deer inside and outside regions where deer sequences containing each mutation are  
 575 found. Odds ratio and the p-values are reported following a Fisher's exact test. GWAS hits  
 576 with OR < 1 or not significantly different from 1 are highlighted in green.

577

| Position | Alternate allele count in deer regions | Wildtype allele count in deer regions | Alternate allele count outside deer regions | Wildtype allele count outside deer regions | Frequency of alternate allele in deer regions | Frequency of alternate allele outside deer regions | p_value     | Conclusion                        |
|----------|----------------------------------------|---------------------------------------|---------------------------------------------|--------------------------------------------|-----------------------------------------------|----------------------------------------------------|-------------|-----------------------------------|
| 7303     | 433                                    | 838982                                | 2226                                        | 10804361                                   | 0.000516101656531368                          | 0.0002                                             | 8.6862e-56  | ratio higher in deer regions      |
| 9430     | 1812                                   | 946458                                | 9313                                        | 10688419                                   | 0.0019145065074203                            | 0.0009                                             | 1.2416e-172 | ratio higher in deer regions      |
| 14960    | 0                                      | 268814                                | 266                                         | 11376922                                   | 0                                             | 2.3381e-05                                         | 0.0035      | ratio lower in deer regions       |
| 20259    | 21                                     | 446625                                | 417                                         | 11198939                                   | 4.70193115029387e-05                          | 3.7236e-05                                         | 0.3171      | ratio not significantly different |
| 28016    | 20                                     | 213258                                | 176                                         | 11432548                                   | 9.37831171632483e-05                          | 1.5395e-05                                         | 8.6845e-10  | ratio higher in deer regions      |
| 12073    | 210                                    | 321652                                | 7184                                        | 11316956                                   | 0.000652879509532041                          | 0.0006                                             | 0.6703      | ratio not significantly different |
| 29679    | 180                                    | 289240                                | 2231                                        | 11354351                                   | 0.000622320564237312                          | 0.0002                                             | 2.80664e-37 | ratio higher in deer regions      |
| 5184     | 7012                                   | 238828                                | 126835                                      | 11273327                                   | 0.0293600415361683                            | 0.0112                                             | 0           | ratio higher in deer regions      |
| 29750    | 1442                                   | 577400                                | 8856                                        | 11058304                                   | 0.00249740214755802                           | 0.0008                                             | 2.2500e-267 | ratio higher in deer regions      |
| 7318     | 131                                    | 272041                                | 1440                                        | 11372390                                   | 0.000481545061222389                          | 0.0001                                             | 9.5330e-35  | ratio higher in deer regions      |
| 16466    | 316970                                 | 860090                                | 864781                                      | 9604161                                    | 0.368531200223232                             | 0.0900                                             | 0           | ratio higher in deer regions      |
| 7267     | 181                                    | 206553                                | 3597                                        | 11435671                                   | 0.000876288410238534                          | 0.0003                                             | 2.1368e-31  | ratio higher in deer regions      |
| 210      | 307476                                 | 869584                                | 854780                                      | 9614162                                    | 0.353589762461131                             | 0.0889                                             | 0           | ratio higher in deer regions      |

|       |        |        |        |          |                      |        |              |                                   |
|-------|--------|--------|--------|----------|----------------------|--------|--------------|-----------------------------------|
| 6730  | 32     | 20464  | 10034  | 11615472 | 0.00156372165754496  | 0.0007 | 0.0018       | ratio higher in deer regions      |
| 27752 | 306844 | 870216 | 842927 | 9626015  | 0.35260670913888     | 0.0876 | 0            | ratio higher in deer regions      |
| 11152 | 196    | 301370 | 9246   | 11335190 | 0.000650363340743936 | 0.0008 | 0.0013       | ratio lower in deer regions       |
| 5822  | 7      | 39079  | 3456   | 11603460 | 0.00017912433787968  | 0.0003 | 0.2361       | ratio not significantly different |
| 9711  | 26     | 391615 | 1331   | 11253030 | 6.63917367822989e-05 | 0.0001 | 0.0020       | ratio lower in deer regions       |
| 9679  | 79     | 561506 | 673    | 11083744 | 0.000140693064722372 | 6.0719 | 2.1058e-10   | ratio higher in deer regions      |
| 7029  | 7      | 157363 | 2276   | 11486356 | 4.44831377134396e-05 | 0.0002 | 4.4009e-07   | ratio lower in deer regions       |
| 29738 | 17     | 20479  | 11278  | 11614228 | 0.000830118658137604 | 0.0001 | 0.6520       | ratio not significantly different |
| 26767 | 318642 | 858418 | 871184 | 9597758  | 0.371196782919277    | 0.0908 | 0            | ratio higher in deer regions      |
| 203   | 726    | 72179  | 19565  | 11553532 | 0.0100583272142867   | 0.0017 | 6.16135e-297 | ratio higher in deer regions      |
| 12820 | 10     | 20486  | 1255   | 11624251 | 0.00048813824074978  | 0.0001 | 0.0001       | ratio higher in deer regions      |
| 4540  | 322    | 195956 | 6718   | 11443006 | 0.00164322603033334  | 0.0006 | 7.7575e-55   | ratio higher in deer regions      |
| 29666 | 1940   | 513027 | 27323  | 11103712 | 0.00378147738812967  | 0.0025 | 3.2392e-66   | ratio higher in deer regions      |

578

579

580

581

582

583

584 **Table S5.** Human-derived sequence counts bearing each of the significant GWAS hits  
 585 identified in mink inside and outside regions where mink sequences containing each  
 586 mutation are found. Odds ratio and the p-values are reported following a Fisher's exact  
 587 test. GWAS hits with OR < 1 or not significantly different from 1 are highlighted in green.

588

| Position | Alternate allele count in mink regions | Wildtype allele count in mink regions | Alternate allele count outside mink regions | Wildtype allele count outside mink regions | Frequency of alternate allele in mink regions | Frequency of alternate allele outside mink regions | p_value              | Conclusion                   |
|----------|----------------------------------------|---------------------------------------|---------------------------------------------|--------------------------------------------|-----------------------------------------------|----------------------------------------------------|----------------------|------------------------------|
| 26047    | 23                                     | 239184                                | 279                                         | 11406516                                   | 9.6160e-05                                    | 2.44597035589132e-05                               | 1.11877702252856e-07 | ratio higher in mink regions |
| 12795    | 34                                     | 152594                                | 340                                         | 11493034                                   | 0.0002                                        | 2.95831370550196e-05                               | 2.75263696173362e-18 | ratio higher in mink regions |
| 23064    | 67                                     | 296468                                | 5363                                        | 11344104                                   | 0.0002                                        | 0.000472756596730777                               | 1.43477105492256e-11 | ratio lower in mink regions  |

589

## 590 References

- 591 Adney, Danielle R., Jamie Lovaglio, Jonathan E. Schulz, Claude Kwe Yinda, Victoria A.  
592 Avanzato, Elaine Haddock, Julia R. Port, et al. 2022. "Severe Acute Respiratory Disease in  
593 American Mink (Neovison Vison) Experimentally Infected with SARS-CoV-2." *bioRxiv*.  
594 <https://doi.org/10.1101/2022.01.20.477164>.
- 595 Bosco-Lauth, Angela M., Airn E. Hartwig, Stephanie M. Porter, Paul W. Gordy, Mary Nehring,  
596 Alex D. Byas, Sue VandeWoude, Izabela K. Ragan, Rachel M. Maison, and Richard A.  
597 Bowen. 2020. "Experimental Infection of Domestic Dogs and Cats with SARS-CoV-2:  
598 Pathogenesis, Transmission, and Response to Reexposure in Cats." *Proceedings of the*  
599 *National Academy of Sciences of the United States of America* 117 (42): 26382–88.
- 600 Cai, Hugh Y., and Allison Cai. 2021. "SARS-CoV2 Spike Protein Gene Variants with N501T and  
601 G142D Mutation-Dominated Infections in Mink in the United States." *Journal of Veterinary*  
602 *Diagnostic Investigation: Official Publication of the American Association of Veterinary*  
603 *Laboratory Diagnosticians, Inc* 33 (5): 939–42.
- 604 Cao, Zengguo, Hongjie Xia, Ricardo Rajsbaum, Xianzhu Xia, Hualei Wang, and Pei-Yong Shi.  
605 2021. "Ubiquitination of SARS-CoV-2 ORF7a Promotes Antagonism of Interferon  
606 Response." *Cellular & Molecular Immunology* 18 (3): 746–48.
- 607 Chen, Chaoran, Sarah Nadeau, Michael Yared, Philippe Voinov, Ning Xie, Cornelius Roemer,  
608 and Tanja Stadler. 2021. "CoV-Spectrum: Analysis of Globally Shared SARS-CoV-2 Data  
609 to Identify and Characterize New Variants." *Bioinformatics*, December.  
610 <https://doi.org/10.1093/bioinformatics/btab856>.
- 611 Chen, Peter E., and B. Jesse Shapiro. 2021. "Classic Genome-Wide Association Methods Are  
612 Unlikely to Identify Causal Variants in Strongly Clonal Microbial Populations." *bioRxiv*.  
613 <https://doi.org/10.1101/2021.06.30.450606>.
- 614 De Maio, Nicola, Chieh-Hsi Wu, Kathleen M. O'Reilly, and Daniel Wilson. 2015. "New Routes to  
615 Phylogeography: A Bayesian Structured Coalescent Approximation." *PLoS Genetics* 11 (8):  
616 e1005421.
- 617 Di Giorgio, Salvatore, Filippo Martignano, Maria Gabriella Torcia, Giorgio Mattiuz, and Silvestro  
618 G. Conticello. 2020. "Evidence for Host-Dependent RNA Editing in the Transcriptome of  
619 SARS-CoV-2." *Science Advances* 6 (25): eabb5813.
- 620 Eckstrand, Chrissy D., Thomas J. Baldwin, Kerry A. Rood, Michael J. Clayton, Jason K. Lott,  
621 Rebecca M. Wolking, Daniel S. Bradway, and Timothy Baszler. 2021. "An Outbreak of  
622 SARS-CoV-2 with High Mortality in Mink (Neovison Vison) on Multiple Utah Farms." *PLoS*  
623 *Pathogens* 17 (11): e1009952.
- 624 Elasad, Ahmed, Mohamed Fawzy, Shereen Basiouni, and Awad A. Shehata. 2020.  
625 "Mutational Spectra of SARS-CoV-2 Isolated from Animals." *PeerJ* 8 (December): e10609.  
626 "Evolutionary Rate of SARS-CoV-2 Increases during Zoonotic Infection of Farmed Mink." 2022.  
627 *Virological*. April 7, 2022. [https://virological.org/t/evolutionary-rate-of-sars-cov-2-increases-](https://virological.org/t/evolutionary-rate-of-sars-cov-2-increases-during-zoonotic-infection-of-farmed-mink/792)  
628 [during-zoonotic-infection-of-farmed-mink/792](https://virological.org/t/evolutionary-rate-of-sars-cov-2-increases-during-zoonotic-infection-of-farmed-mink/792).
- 629 Gilbert, Clément, and Torstein Tengs. 2021. "No Species-Level Losses of s2m Suggests Critical  
630 Role in Replication of SARS-Related Coronaviruses." *Scientific Reports* 11 (1): 16145.
- 631 Hadfield, James, Colin Megill, Sidney M. Bell, John Huddleston, Barney Potter, Charlton  
632 Callender, Pavel Sagulenko, Trevor Bedford, and Richard A. Neher. 2018. "Nextstrain:  
633 Real-Time Tracking of Pathogen Evolution." *Bioinformatics* 34 (23): 4121–23.
- 634 Harris, Reuben S., and Jaquelin P. Dudley. 2015. "APOBECs and Virus Restriction." *Virology*  
635 479-480 (May): 131–45.
- 636 Hillen, Hauke S., Goran Kobic, Lucas Farnung, Christian Dienemann, Dimitry Tegunov, and  
637 Patrick Cramer. 2020. "Structure of Replicating SARS-CoV-2 Polymerase." *Nature* 584  
638 (7819): 154–56.
- 639 Katoh, Kazutaka, and Daron M. Standley. 2013. "MAFFT Multiple Sequence Alignment

- 640 Software Version 7: Improvements in Performance and Usability.” *Molecular Biology and*  
641 *Evolution* 30 (4): 772–80.
- 642 Kotwa, Jonathon D., Ariane Massé, Marianne Gagnier, Patryk Aftanas, Juliette Blais-Savoie,  
643 Jeff Bowman, Tore Buchanan, et al. 2022. “First Detection of SARS-CoV-2 Infection in  
644 Canadian Wildlife Identified in Free-Ranging White-Tailed Deer (*Odocoileus Virginianus*)  
645 from Southern Québec, Canada.” *bioRxiv*. <https://doi.org/10.1101/2022.01.20.476458>.
- 646 Kuchipudi, Suresh V., Meera Surendran-Nair, Rachel M. Ruden, Michele Yon, Ruth H. Nissly,  
647 Kurt J. Vandegrift, Rahul K. Nelli, et al. 2022. “Multiple Spillovers from Humans and Onward  
648 Transmission of SARS-CoV-2 in White-Tailed Deer.” *Proceedings of the National Academy*  
649 *of Sciences of the United States of America* 119 (6).  
650 <https://doi.org/10.1073/pnas.2121644119>.
- 651 Liu, Guanqun, Jung-Hyun Lee, Zachary M. Parker, Dhiraj Acharya, Jessica J. Chiang, Michiel  
652 van Gent, William Riedl, et al. 2021. “ISG15-Dependent Activation of the Sensor MDA5 Is  
653 Antagonized by the SARS-CoV-2 Papain-like Protease to Evade Host Innate Immunity.”  
654 *Nature Microbiology* 6 (4): 467–78.
- 655 Liu, Yang, Jianying Liu, Kenneth S. Plante, Jessica A. Plante, Xuping Xie, Xianwen Zhang,  
656 Zhiqiang Ku, et al. 2021. “The N501Y Spike Substitution Enhances SARS-CoV-2 Infection  
657 and Transmission.” *Nature*, November. <https://doi.org/10.1038/s41586-021-04245-0>.
- 658 Lu, Lu, Reina S. Sikkema, Francisca C. Velkers, David F. Nieuwenhuijse, Egil A. J. Fischer,  
659 Paola A. Meijer, Noortje Bouwmeester-Vincken, et al. 2021. “Adaptation, Spread and  
660 Transmission of SARS-CoV-2 in Farmed Minks and Associated Humans in the  
661 Netherlands.” *Nature Communications* 12 (1): 6802.
- 662 Miao, Zhichao, Antonin Tidu, Gilbert Eriani, and Franck Martin. 2021. “Secondary Structure of  
663 the SARS-CoV-2 5’-UTR.” *RNA Biology* 18 (4): 447–56.
- 664 Morales Lucia, Mateos-Gomez Pedro A., Capiscol Carmen, del Palacio Lorena, Enjuanes Luis,  
665 and Sola Isabel. 2013. “Transmissible Gastroenteritis Coronavirus Genome Packaging  
666 Signal Is Located at the 5’ End of the Genome and Promotes Viral RNA Incorporation into  
667 Virions in a Replication-Independent Process.” *Journal of Virology* 87 (21): 11579–90.
- 668 Murall, Carmen Lía, Eric Fournier, Jose Hector Galvez, Arnaud N’Guessan, Sarah J. Reiling,  
669 Pierre-Olivier Quirion, Sana Naderi, et al. 2021. “A Small Number of Early Introductions  
670 Seeded Widespread Transmission of SARS-CoV-2 in Québec, Canada.” *Genome Medicine*  
671 13 (1): 169.
- 672 Newman, Joseph A., Alice Douangamath, Setayesh Yadzani, Yuliana Yosaatmadja, Antony  
673 Aimon, José Brandão-Neto, Louise Dunnett, et al. 2021. “Structure, Mechanism and  
674 Crystallographic Fragment Screening of the SARS-CoV-2 NSP13 Helicase.” *Nature*  
675 *Communications* 12 (1): 4848.
- 676 Nguyen, Lam-Tung, Heiko A. Schmidt, Arndt von Haeseler, and Bui Quang Minh. 2015. “IQ-  
677 TREE: A Fast and Effective Stochastic Algorithm for Estimating Maximum-Likelihood  
678 Phylogenies.” *Molecular Biology and Evolution* 32 (1): 268–74.
- 679 Oreshkova, Nadia, Robert Jan Molenaar, Sandra Vreman, Frank Harders, Bas B. Oude  
680 Munnink, Renate W. Hakze-van der Honing, Nora Gerhards, et al. 2020. “SARS-CoV-2  
681 Infection in Farmed Minks, the Netherlands, April and May 2020.” *Euro Surveillance:*  
682 *Bulletin European Sur Les Maladies Transmissibles = European Communicable Disease*  
683 *Bulletin* 25 (23). <https://doi.org/10.2807/1560-7917.ES.2020.25.23.2001005>.
- 684 Otto, Sarah P., Troy Day, Julien Arino, Caroline Colijn, Jonathan Dushoff, Michael Li, Samir  
685 Mechai, et al. 2021. “The Origins and Potential Future of SARS-CoV-2 Variants of Concern  
686 in the Evolving COVID-19 Pandemic.” *Current Biology: CB* 0 (0).  
687 <https://doi.org/10.1016/j.cub.2021.06.049>.
- 688 Oude Munnink, Bas B., Reina S. Sikkema, David F. Nieuwenhuijse, Robert Jan Molenaar,  
689 Emmanuelle Munger, Richard Molenkamp, Arco van der Spek, et al. 2021. “Transmission  
690 of SARS-CoV-2 on Mink Farms between Humans and Mink and back to Humans.” *Science*



- 691 371 (6525): 172–77.
- 692 Paradis, Emmanuel, and Klaus Schliep. 2019. “Ape 5.0: An Environment for Modern  
693 Phylogenetics and Evolutionary Analyses in R.” *Bioinformatics* 35 (3): 526–28.
- 694 Pickering, Bradley, Oliver Lung, Finlay Maguire, Peter Kruczkiewicz, Jonathan D. Kotwa, Tore  
695 Buchanan, Marianne Gagnier, et al. 2022. “Highly Divergent White-Tailed Deer SARS-CoV-  
696 2 with Potential Deer-to-Human Transmission.” *bioRxiv*.  
697 <https://doi.org/10.1101/2022.02.22.481551>.
- 698 Redondo, Natalia, Sara Zaldívar-López, Juan J. Garrido, and Maria Montoya. 2021. “SARS-  
699 CoV-2 Accessory Proteins in Viral Pathogenesis: Knowns and Unknowns.” *Frontiers in*  
700 *Immunology* 12 (July): 708264.
- 701 Rosenberg, Brad R., Claire E. Hamilton, Michael M. Mwangi, Scott Dewell, and F. Nina  
702 Papavasiliou. 2011. “Transcriptome-Wide Sequencing Reveals Numerous APOBEC1  
703 mRNA-Editing Targets in Transcript 3’ UTRs.” *Nature Structural & Molecular Biology* 18 (2):  
704 230–36.
- 705 Salter, Jason D., and Harold C. Smith. 2018. “Modeling the Embrace of a Mutator: APOBEC  
706 Selection of Nucleic Acid Ligands.” *Trends in Biochemical Sciences* 43 (8): 606–22.
- 707 Sheahan, Timothy P., Amy C. Sims, Shuntai Zhou, Rachel L. Graham, Andrea J. Pruijssers,  
708 Maria L. Agostini, Sarah R. Leist, et al. 2020. “An Orally Bioavailable Broad-Spectrum  
709 Antiviral Inhibits SARS-CoV-2 in Human Airway Epithelial Cell Cultures and Multiple  
710 Coronaviruses in Mice.” *Science Translational Medicine* 12 (541).  
711 <https://doi.org/10.1126/scitranslmed.abb5883>.
- 712 Shi, Jianzhong, Zhiyuan Wen, Gongxun Zhong, Huanliang Yang, Chong Wang, Baoying Huang,  
713 Renqiang Liu, et al. 2020. “Susceptibility of Ferrets, Cats, Dogs, and Other Domesticated  
714 Animals to SARS-Coronavirus 2.” *Science* 368 (6494): 1016–20.
- 715 Shin, Donghyuk, Rukmini Mukherjee, Diana Grewe, Denisa Bojkova, Kheewoong Baek, Anshu  
716 Bhattacharya, Laura Schulz, et al. 2020. “Papain-like Protease Regulates SARS-CoV-2  
717 Viral Spread and Innate Immunity.” *Nature* 587 (7835): 657–62.
- 718 Starr, Tyler N., Allison J. Greaney, Sarah K. Hilton, Daniel Ellis, Katharine H. D. Crawford,  
719 Adam S. Dingens, Mary Jane Navarro, et al. 2020. “Deep Mutational Scanning of SARS-  
720 CoV-2 Receptor Binding Domain Reveals Constraints on Folding and ACE2 Binding.” *Cell*  
721 182 (5): 1295–1310.e20.
- 722 Tan, Cedric C. S., Su Datt Lam, Damien Richard, Christopher J. Owen, Dorothea Berchtold,  
723 Christine Orengo, Meera Surendran Nair, et al. 2022. “Transmission of SARS-CoV-2 from  
724 Humans to Animals and Potential Host Adaptation.” *Nature Communications* 13 (1): 1–13.
- 725 Tengs, Torstein, Anja Bråthen Kristoffersen, Tsvetan R. Bachvaroff, and Christine Monceyron  
726 Jonassen. 2013. “A Mobile Genetic Element with Unknown Function Found in Distantly  
727 Related Viruses.” *Virology Journal* 10 (April): 132.
- 728 Vöhringer, Harald S., Theo Sanderson, Matthew Sinnott, Nicola De Maio, Thuy Nguyen,  
729 Richard Goater, Frank Schwach, et al. 2021. “Genomic Reconstruction of the SARS-CoV-2  
730 Epidemic in England.” *Nature*, October. <https://doi.org/10.1038/s41586-021-04069-y>.
- 731 Wacker, Anna, Julia E. Weigand, Sabine R. Akabayov, Nadide Altincekic, Jasleen Kaur Bains,  
732 Elnaz Banijamali, Oliver Binns, et al. 2020. “Secondary Structure Determination of  
733 Conserved SARS-CoV-2 RNA Elements by NMR Spectroscopy.” *Nucleic Acids Research*  
734 48 (22): 12415–35.
- 735 Wei, Changshuo, Ke-Jia Shan, Weiguang Wang, Shuya Zhang, Qing Huan, and Wenfeng Qian.  
736 2021. “Evidence for a Mouse Origin of the SARS-CoV-2 Omicron Variant.” *bioRxiv*.  
737 <https://doi.org/10.1101/2021.12.14.472632>.
- 738 Worobey, Michael, Joshua I. Levy, Lorena M. Malpica Serrano, Alexander Crits-Christoph,  
739 Jonathan E. Pekar, Stephen A. Goldstein, Angela L. Rasmussen, et al. 2022. *The Huanan*  
740 *Market Was the Epicenter of SARS-CoV-2 Emergence*.  
741 <https://doi.org/10.5281/zenodo.6299116>.

- 742 Yang, Dong, and Julian L. Leibowitz. 2015. "The Structure and Functions of Coronavirus  
743 Genomic 3' and 5' Ends." *Virus Research* 206 (August): 120–33.
- 744 Yen, Hui-Ling, Thomas H. C. Sit, Christopher J. Brackman, Shirley S. Y. Chuk, Haogao Gu,  
745 Karina W. S. Tam, Pierra Y. T. Law, et al. 2022. "Transmission of SARS-CoV-2 Delta  
746 Variant (AY.127) from Pet Hamsters to Humans, Leading to Onward Human-to-Human  
747 Transmission: A Case Study." *The Lancet* 399 (10329): 1070–78.
- 748 Zhou, Jie, Thomas P. Peacock, Jonathan C. Brown, Daniel H. Goldhill, Ahmed M. E. Elrefaey,  
749 Rebekah Penrice-Randal, Vanessa M. Cowton, et al. 2022. "Mutations That Adapt SARS-  
750 CoV-2 to Mink or Ferret Do Not Increase Fitness in the Human Airway." *Cell Reports* 38 (6):  
751 110344.

752
